# Supplementary material for: First-principles study on novel Fe-based quaternary Heusler alloys, with robust half-metallic, thermoelectric and optical properties
Source: Royal Society of Chemistry journal article supplement (doi:10.1039/d3ra00942d), 2023-01-01
Supplement: d3ra00942d1.pdf [file d3ra00942d1.pdf]

### supplemental document

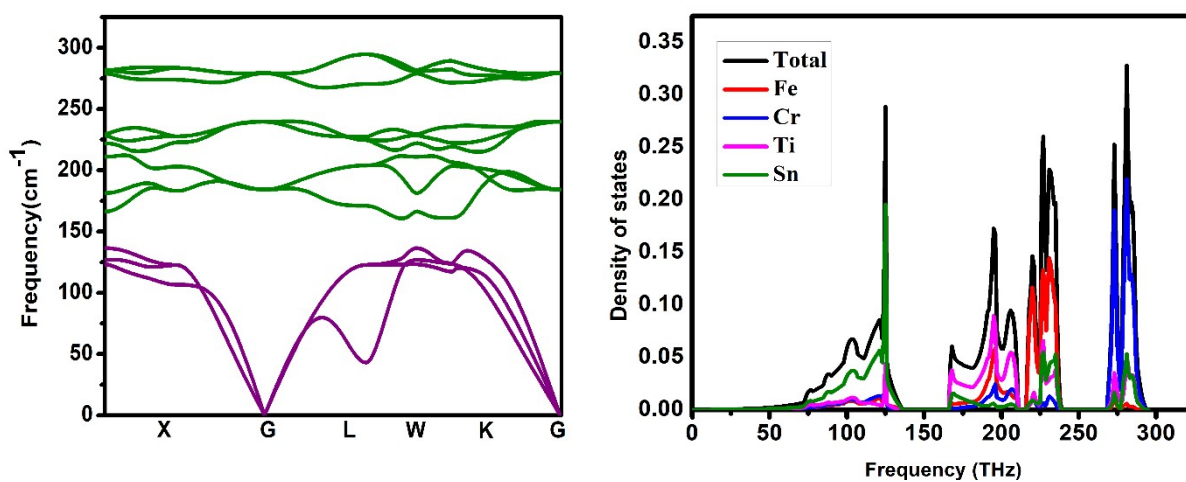

Fig 1. (a) Phonon dispersion curve and (b) total and partial density of states (DOS) of FeCrTiSn

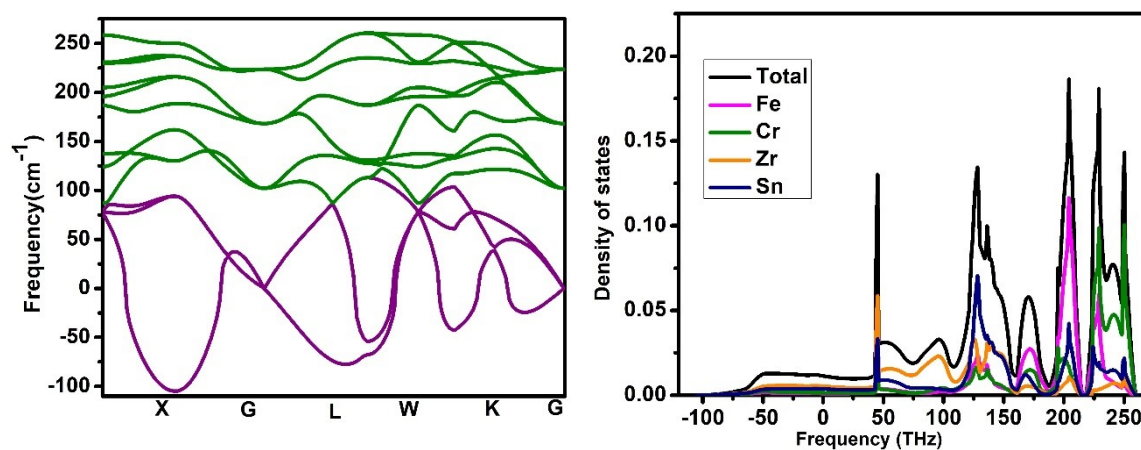

Fig 1. (b) Phonon dispersion curve and (b) total and partial density of states (DOS) of FeCrZrSn

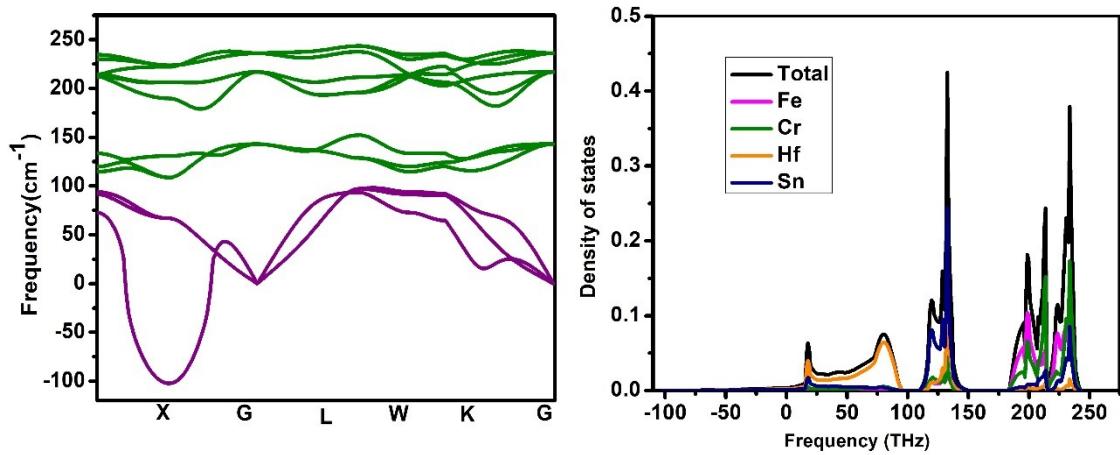

Fig 1. (c) Phonon dispersion curve and (b) total and partial density of states (DOS) of FeCrHfSn

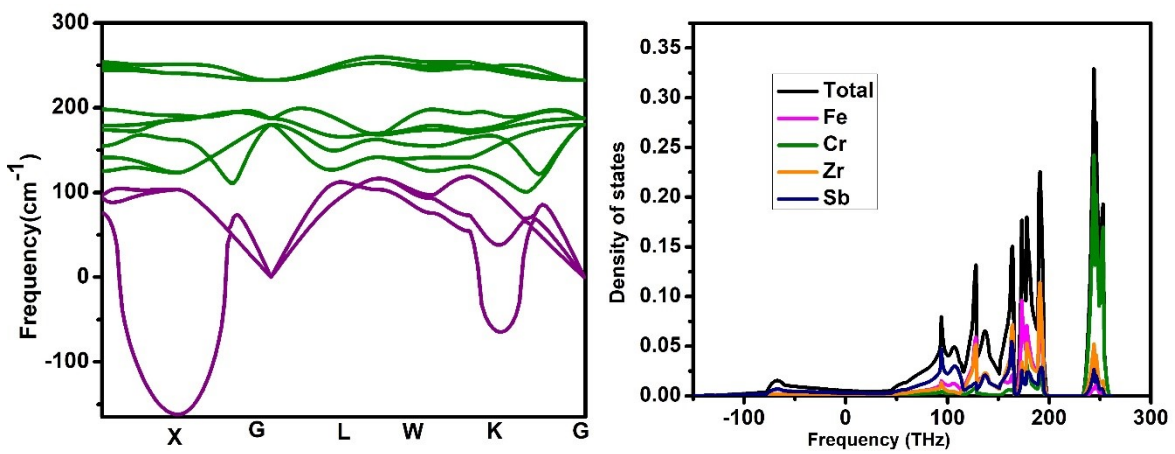

Fig 1. (d) Phonon dispersion curve and (b) total and partial density of states (DOS) of FeCrZrSb

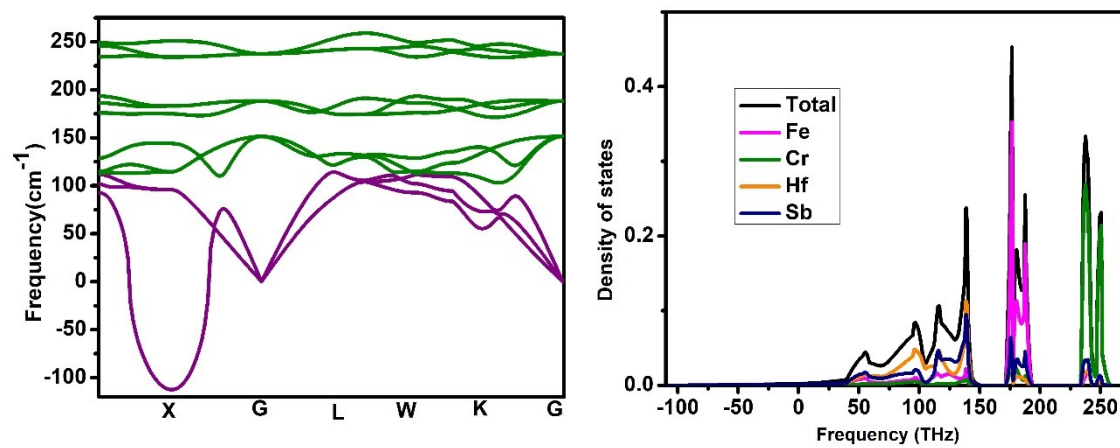

Fig 1. (e) Phonon dispersion curve and (b) total and partial density of states (DOS) of FeCrHfSb
